# Supplementary material for: Melanesian mtDNA Complexity
Source: PLoS One. 2007 Feb 28;2(2):e248. doi: 10.1371/journal.pone.0000248 (PMC1803017; doi:10.1371/journal.pone.0000248)
Supplement: Table S1 — Defining Mutations for mtDNA Haplogroups found in Island Melanesia (0.02 MB XLS) [file pone.0000248.s001.xls]

## Sheet: Supp Table
	Supplementary Table1. Defining Mutations for mtDNA Haplogroups found in Island Melanesia
	Haplogroup			HVS 1		HVS 2		Coding Region
	B4a1a1			16189, 16217, 16261		146		9bp del, 10398
	B4a1a1a			16189, 16217, 16261, 16247		146		9bp del, 10398
	B4b1			16189, 16217, 16136		207		9bp del
	P1			16357, 16176, 16266		212		10398, 15607, 6077
	P2a			16278, 16497		143		10398, 15607, 8572
	P2b			16184, 16256				10398, 15607, 8572
	P3			CRS		127, 128		10398, 15607, 3645, 14338, 15748
	P4a			16319		35, 36, 146, 152		15607
	Q1			16223, 16129, 16241, 16311, 16265C, 16144, 16148, 16343		89, 146, 92		10400, 4177, 12940
	Q2			16223, 16129, 16241, 16066		228T, 195		10400, 4177, 12940
	Q3			16223, 16129, 16241, 16311		143		10400, 4177, 12940
	E1	a		16223, 16362, 16390, 16291				10400, 4491, 7598, 10834
		b		16223, 16362, 16390, 16261				10400, 4491, 7598, 10834
	E2			16223, 16362, 16390, 16051				10400, 4491, 7598
	M27	a		16223, 16048, 16077T, 16172, 16311, 16320		195 , 234, 228		10400, 5375, 9201, 12538
		b		16209, 16299, 16390				10400, 5375, 9201, 12538
		c		16223, 16301, 16304		146, 186		10400, 5375, 9201, 12538
	M28	a		16223, 16148, 16468, 16362, 16086, 16129		152, 195		10400, 10658
		a1		16223, 16148, 16468, 16362, 16086, 16129, 16320		152, 195		10400, 10658
		a2		16223, 16148, 16468, 16362, 16086, 16129, 16429		152, 195		10400, 10658
		a3		16223, 16148, 16468, 16362, 16086, 16129, 16189, 16209		152 195 279		10400, 10658
		a4		16223, 16148, 16468, 16362, 16086, 16129, 16051		152 195 198		10400, 10658
		b1		16223, 16148, 16468, 16362, 16318C		152, 94		10400, 12172
		b2		16223, 16148, 16468, 16362, 16318T		152, 94		10400, 12172
	M29	a		16223, 16189		211, 310		10400
		b		16223, 16189, 16294		211		10400
	Bold faced nts denote key mutations
