# Supplementary material for: Melanesian mtDNA Complexity
Source: PLoS One. 2007 Feb 28;2(2):e248. doi: 10.1371/journal.pone.0000248 (PMC1803017; doi:10.1371/journal.pone.0000248)
Supplement: Table S2 — mtDNA Lineage Occurences in Island Melanesia (Individuals) (0.03 MB XLS) [file pone.0000248.s002.xls]

## Sheet: Table S2
Table S2	mtDNA Lineage Occurences in Island Melanesia (Individuals)
				B		P				Q			E			M27			M28							M29
Island	Region	Population	n	B4a1a1	B4b1	P1	P2	P3	P4	Q1	Q2	Q3	E1a	E1b	E2	M27a	M27b	M27c	a	a1	a2	a3	a4	b1	b2	a	b	F	Y	M7
New Guinea	West New Guinea	Southwest Riverine	33	1		7	6			19
		Lowland Riverine	27			3		1	1	22
	PNG Coast	Markham	67	22		9	5		7	12	10																	2
		North Coast	14	4		6				4
		Rigo	18	10		1	6							1
	PNG Highlands	Eastern Highlands	4			2				1	1
		Fringe Highlands	18			4			9	3		2
		Morobe Highlands	20	7		5	7			1
		Western Highlands	18			10	1			7
PNG Island	PNG Island	Misima	7			4	2																	1
		Rossel	5			3							1		1
Manus	Manus	Manus	2							2
New Britain	West New Britain	Kove	20	11						1		5		1			1					1
		Anêm	19	11		2				6
		Mangseng	17	4		1	1			4	2		3	2
		Mamusi	63	1						20	6			19						17
		Nakanai	64	23		1				9	1									3	21						6
		Nakanai (Loso)	17		1				3	8	2			2						1
		Mengen	23	7		2				6				5							3
		Melamela	23	2		7				1													5			2	6
		Ata	58							2	18			23						14				1
		Kol	57	14						7	6		4							7	14			5
	East New Britain	Sulka	28	3	1					5				3	1					3	6	6
		Tolai	78	13		4				4							13				1	13			7	22			1
		Mali (Baining)	58			2				1	21										10	1		23
		Kaket (Baining)	59			3					2									1	24			28	1
Mussau	Mussau	Mussau	16	8							8
New Hanover	Lavongai	Lavongai	18	12		1			1					4
New Ireland	North New Ireland AN	Tigak	27	23		2	1				1
		Nalik	24	15							7																2
		Notsi	23	19						1	1							2
		Madak	31	15							5			9				1			1
	New Ireland PAP	Kuot	62	59																	1	1			1
Bougainville	North Bougainville	Saposa	25	22	1					2
		Teop	20	10						2				5		3
		Buka	15	9						4				1			1
	Central Bougainville	Aita	54	2		8				42						2
		Rotokas	19							8						11
		Eivo	19	13						2						2		1					1
	South Bougainville	Simeku	7	3												2		1					1
		Nasioi	33	16						5						8		4
		Nagovisi	16	16
		Siwai	19	14												5
		Torau	46	26												11		3	3				2					1
Solomon Islands	Solomons	Solomons	28	18	1	1										2	2				1			2			1
	Malaita	Malaita - Baegu	134	97						4	5						28
		Malaita -Lau	57	36						6						2	10	2					1
		Malaita - Kwaio	54	32						7						7		6				1	1
	Santa Cruz		69	23		5			1	12	7										18	1			2
Vanuatu			23	8		4					2										1	3			3		1	1
New Caledonia			25	6		2	8				1						1			1	2		1					1		2
Fiji			15	9			1			2	1										1	1
Micronesia			47	32	4																									11
			1743	676	8	99	38	1	22	242	107	7	8	75	2	55	56	20	3	47	104	28	12	60	14	24	16	5	1	13
Papuan Speakers are underlined
