# Supplementary material for: Melanesian mtDNA Complexity
Source: PLoS One. 2007 Feb 28;2(2):e248. doi: 10.1371/journal.pone.0000248 (PMC1803017; doi:10.1371/journal.pone.0000248)
Supplement: Table S4 — Measures of Haplotype diversity in 32 Northern Melanesia population using HVS1 (0.02 MB XLS) [file pone.0000248.s004.xls]

## Sheet: Table S4
Table S4. Measures of Haplotype diversity in 32 Northern Melanesia population using HVS1
		no of		Standard Gene Diversity			Mean number of			Nucleotide diversity
	n	haplotype					pairwise differences			(average over loci)
					s.d.			s.d.			s.d.
Anem	17	6		0.7132	0.1081		6.01471	3.01544		0.013161	0.007384
Ata	58	14		0.7967	0.0379		5.44767	2.66112		0.009959	0.005396
Kol	57	16		0.8941	0.0204		8.1084	3.81905		0.014823	0.007744
Sulka	28	18		0.9603	0.0241		6.87037	3.3327		0.013062	0.007054
Baining(Mali)	58	11		0.758	0.0373		5.91772	2.86586		0.010819	0.005811
Baining (Kaket)	59	14		0.8036	0.0334		4.0374	2.04469		0.007381	0.004146
Kove	17	7		0.75	0.0924		5.52941	2.79613		0.011866	0.006715
Loso	16	8		0.85	0.0772		7.225	3.57348		0.013233	0.007331
Nakanai	65	20		0.8582	0.0294		5.89135	2.84992		0.011854	0.006358
Mamusi	62	13		0.9276	0.0193		7.68482	3.63073		0.014049	0.00736
Mangseng	17	15		0.9926	0.023		8.22794	4.01364		0.015977	0.008722
Melamela	21	14		0.9333	0.0397		5.49524	2.75312		0.016552	0.009257
Mengen	23	11		0.917	0.0319		8.6166	4.13153		0.016136	0.008628
Tolai	77	29		0.9539	0.0149		6.97368	3.31329		0.014088	0.007418
New Britain	575			0.86647	0.0330901		6.45848	3.12125		0.0125306	0.00673463
Kuot	62	13		0.981	0.0122		2.4019	1.32288		0.004391	0.002682
Lavongai	18	12		0.915	0.0521		4.08497	2.13545		0.008041	0.004701
Nailik	24	10		0.9638	0.0253		4.24275	2.18018		0.007799	0.004468
Tigak	26	14		0.9815	0.0205		3.91692	2.02878		0.007161	0.004132
Notsi	17	12		0.9191	0.0571		3.42647	1.84186		0.008946	0.005382
Madak	31	10		0.9806	0.0162		4.42581	2.24363		0.008091	0.004563
New Ireland	178			0.966098	0.0241983		3.49193	1.83367		0.00670362	0.00392423
Aita	52	6		0.6395	0.0533		5.54826	2.70951		0.010143	0.005496
Rotokas	19	4		0.7427	0.0615		6.8655	3.38064		0.012551	0.006907
Siwai	19	10		0.9181	0.0468		4.91228	2.50307		0.00903	0.005142
Nagovisi	15	3		0.8	0.108		0.666667	0.541229		0.001219	0.001109
Nasioi	30	9		0.954	0.0197		7.91724	3.78701		0.014854	0.007907
Saposa	21	14		0.9667	0.0301		3.81905	2.00092		0.007219	0.004222
Buka	15	9		0.9238	0.044		7.21905	3.58433		0.013647	0.007597
Teop	17	8		0.9338	0.0456		7.30882	3.59941		0.013362	0.007364
Torau	45	18		0.8949	0.0336		7.52525	3.57995		0.013757	0.007266
Bougainville	233			0.840052	0.0455777		6.05655	2.97204		0.0111755	0.00610877
Baegu	131	21		0.8537	0.0262		4.31086	2.14759		0.007881	0.004347
Kwaio	52	7		0.6916	0.0583		6.38235	3.07322		0.011668	0.006234
Lau	54	19		0.9406	0.023		6.2376	3.00832		0.011403	0.006102
Malaita	237			0.837934	0.0325139		5.20437	2.5468		0.00951438	0.0051609
